# Supplementary material for: A Temporal Perspective on Organizational Identity
Source: Atypon-hosted journal article supplement (doi:10.1287/orsc.1110.0731), 2012-05-24
Supplement: orsc.1110.0731-sm-online_appendix.pdf [file orsc.1110.0731-sm-online_appendix.pdf]

## Online Appendix. Links and Additional LEGO Material

Brûle, T. 2007. A well-played company. *Monocle* (March) <http://www.monocle.com/sections/business/Web-Articles/QAwith-the-CEO-of-Lego/>.

Koerner, B. I. 2006. Geeks in toyland. *Wired* (February) <http://www.wired.com/wired/archive/14.02/lego.html>.

LEGO annual reports. 2001–2008. First accessed February 1, 2009, <http://www.lego.com/eng/info/default.asp?page=annualreport>.

LEGO press releases. 2000–2009. First accessed February 1, 2009, <http://www.lego.com/eng/info/default.asp?page=pressarchive>.

LEGO Users Group Network. First accessed December 1, 2008, <http://www.lugnet.com>.
